# Supplementary material
Source: PubMed Central journal article supplement (PMC4363086)
Supplement: NIHMS668819-supplement-supplemental_file.pdf [file NIHMS668819-supplement-supplemental_file.pdf]

## Supporting Material

### A Novel Insulin Secretagogue Based on a Dinucleoside Polyphosphate Scaffold<sup>#</sup>

Shay Elyahu <sup>a</sup>, Haim M. Barr <sup>b</sup>, Jean Camden <sup>c</sup>, Gary A. Weisman <sup>c</sup>, and Bilha Fischer <sup>\*a</sup>

Department of Chemistry, Bar-Ilan University, Ramat-Gan 52900, Israel; *b.* BioLineRx Ltd.,  
23 Hillel Street, Jerusalem, 91450, Israel; *c.* Biochemistry Department, 540E Bond Life Sciences Center,  
University of Missouri-Columbia, Columbia, MO 65211

#### Table of Contents

| Page  | Topics                                                                           |
|-------|----------------------------------------------------------------------------------|
| S2-S3 | <b>Fig. 1.</b> Characterization of analogues <b>8-10</b> by <sup>31</sup> P NMR. |
| S4    | <b>Scheme 1</b> Synthesis of analogues <b>9</b>                                  |
| S5    | <b>Scheme 2</b> Synthesis of analogues <b>10</b>                                 |

**Fig. 1**

**A**

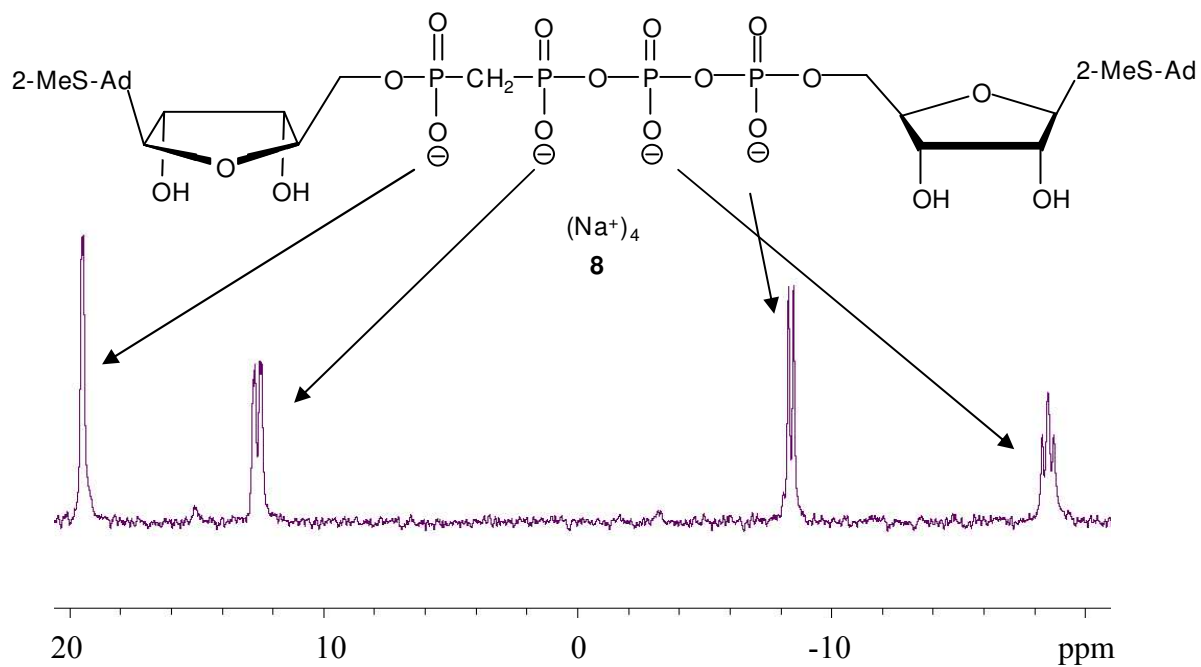

**B**

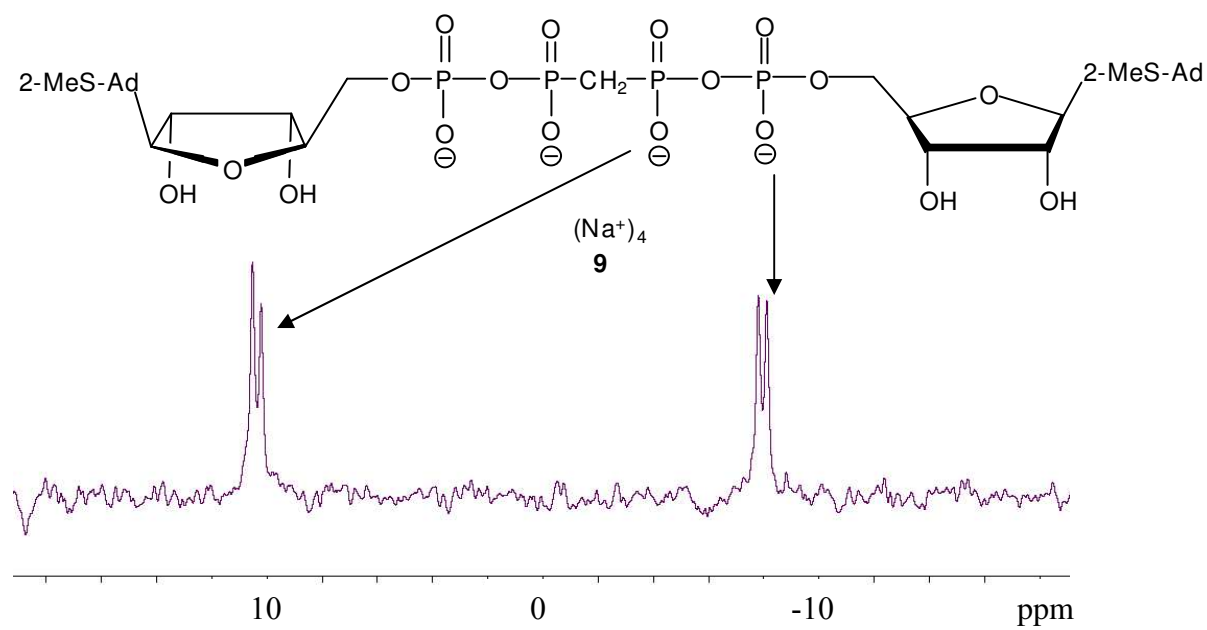

c

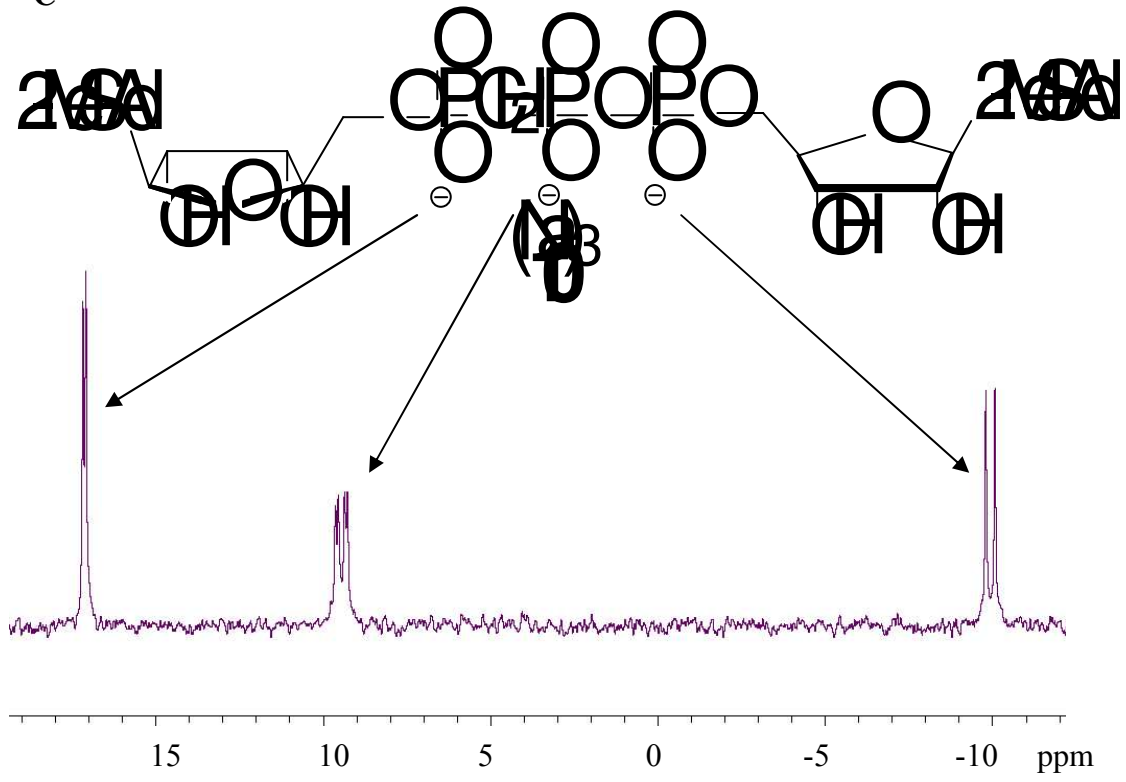

## Scheme 1

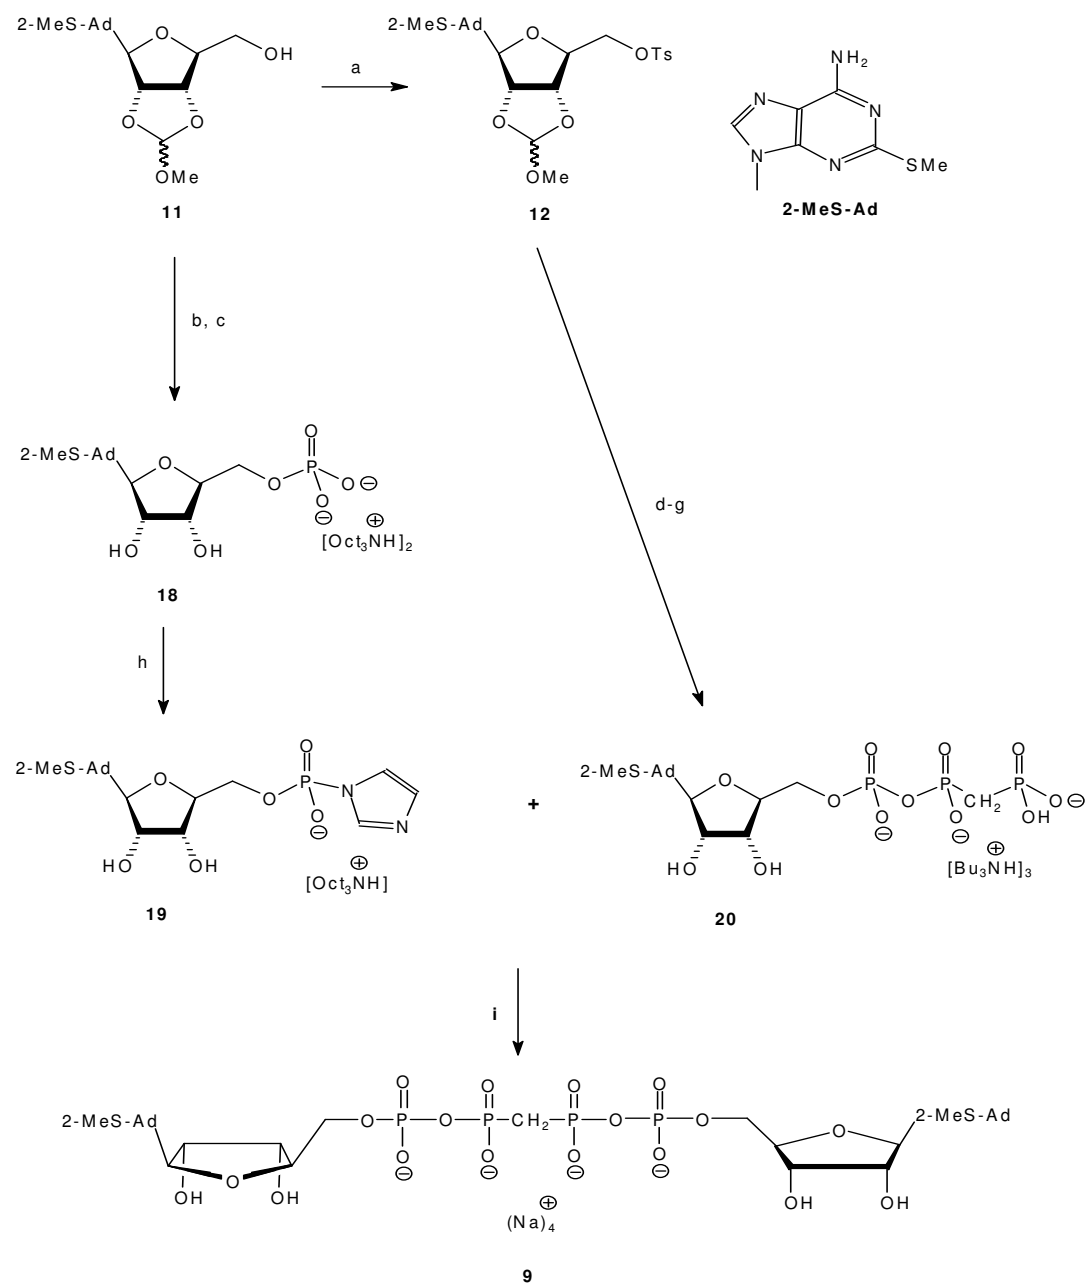

**Reaction conditions:** a)  $\text{HC}(\text{OMe})_3$ , *p*-TsOH, DMF, RT, 24 h; b)  $\text{POCl}_3$ , trimethylphosphate, proton sponge,  $-15^\circ\text{C}$ , 2 h; c) 1 M TEAB, pH 7, RT, 1 h; d)  $\text{POCl}_3$ , trimethylphosphate, proton sponge,  $-15^\circ\text{C}$ , 2 h; e) 0.5 M bis(tributylammonium)methylene diphosphonate in dry DMF,  $\text{Bu}_3\text{N}$ ,  $0^\circ\text{C}$ ; f) 0.2 M TEAB, pH 7, RT, 1 h; g) 18% HCl, pH 2.3, RT for 3 h followed by 24%  $\text{NH}_4\text{OH}$ , pH 9, RT for 45 min; h) CDI, DMF, RT, 3 h; i)  $\text{MgCl}_2$ , RT, 12 h.

## Scheme 2

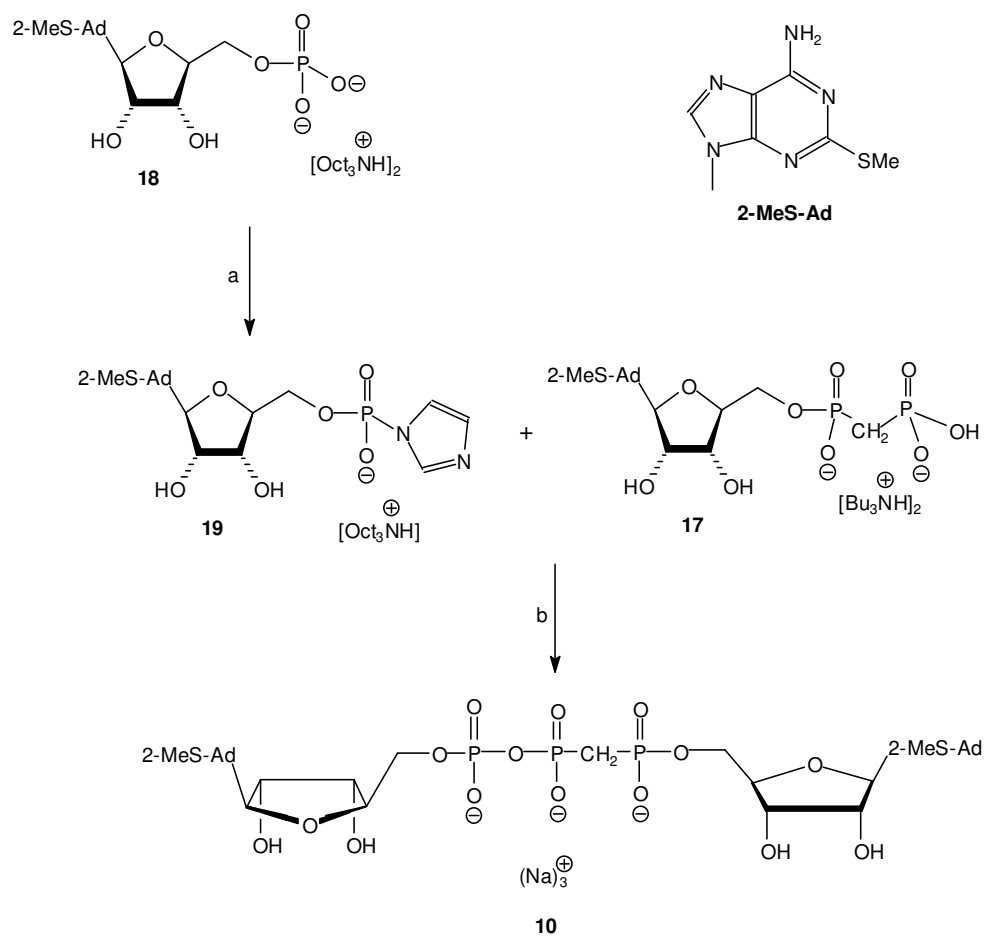

**Reaction conditions:** a) CDI, DMF, RT, 3 h; b)  $\text{MgCl}_2$ , RT, 12 h.
